# Supplementary material for: Auditor Skill Demands and Audit Quality: Evidence from Job Postings
Source: Atypon-hosted journal article supplement (doi:10.1287/mnsc.2022.01640), 2024-10-16
Supplement: mnsc.2022.01640.sm1.pdf [file mnsc.2022.01640.sm1.pdf]

**Internet Appendix**  
**Auditor Skill Demands and Audit Quality: Evidence from Job Postings**  
**Charles Ham, Rebecca Hann, Maryjane Rabier, Wenfeng Wang**  
**May 2024**

The table below explores the degree to which a series of observable characteristics explains the variation in the demand for auditors' cognitive and social skills. If the job posts are simply boilerplate, or are standardized by the human resources department, we expect there to be little within firm or office variation in the skill demands (i.e., accounting firm or office fixed effects should absorb the vast majority of the variation in the skill demands). We thus regress each skill type on a series of fixed effects and control variables to gauge the degree to which each explains variation in the skill demands. We initially include accounting firm, MSA, and year fixed effects, as well as controls for job seniority (e.g., associate, manager, etc.), education, and experience. We conduct this analysis (1) to better understand the determinants of the demand for cognitive and social skills in the audit industry, and (2) to gauge whether there is sufficient variation in the demand for cognitive and social skills to examine their relation with audit quality. We estimate the following model:

$$\begin{aligned} Skill = & \beta_0 + \beta_1 Edu + \beta_2 Missing(Edu) + \beta_3 Exp + \beta_4 Missing(Exp) \\ & + \beta_5 Hierarchy + Accounting Firm FE + MSA FE + Year FE + \varepsilon, \end{aligned} \quad (1)$$

where *Edu* is equal to the log of the number of years of education demanded in the job posting (e.g., 12 for a high school degree, 14 for an associate degree, 16 for a college degree, etc.) and *Exp* is equal to the log of the number of years of prior work experience demanded in the job posting. Both variables have relatively high numbers of missing values (in our sample, education requirements are missing in approximately 13% of the job postings and experience requirements are missing in approximately 37% of the job postings). To avoid sample attrition, we set both variables equal to zero when missing and include indicator variables that are set to one for these observations [*Missing(Edu)* and *Missing(Exp)*]. *Hierarchy* is the log of a count variable to capture the rank of the position within the audit team hierarchy. Specifically, it is set equal to 1 for associates, 2 for senior associates, 3 for managers, 4 for senior managers, 5 for directors, and 6 for partners (interns are dropped from the sample). The remainder of the variables are a set of fixed effects—accounting firm, MSA, and year. We conduct this analysis at the job posting level (i.e., each observation is a job posting). Table 2 Panel B reports the results.

As may have been expected, accounting firm fixed effects explain the most variation in the skill demands—roughly 10% (19%) of the variation in cognitive (social) skill demands. The variables capturing location, year, education, experience, and seniority together explain approximately 4% (5%) of the variation in cognitive (social) skill demands. But, there is also considerable unexplained variation (86% for cognitive skills and 76% for social skills), suggesting the job posts contain more than just across firm variation (i.e., there is a firm effect, but the firm does not completely standardize the job posts). Next, we estimate the same models, but replace the accounting firm and MSA fixed effects with audit office fixed effects (i.e., accounting firm by MSA fixed effects). The results are reported in Table 2 Panel C. The audit office fixed effects explain much more of the variation in skill requirements—15% (25%) for cognitive (social) skills—suggesting there is within accounting firm variation in the skill demands, but considerable unexplained variation remains.

This analysis suggests (i) there is considerable variation in the demand for cognitive and social skills in auditors that is not picked up by the accounting firm or office fixed effects, and (ii) the audit office fixed effects pick up more variation in the skill demands relative to accounting firm fixed effects, suggesting that audit offices are not completely homogenous in their demand for auditor skills, even within the same firm.

The two panels below report the explanatory power of different factors affecting the variation in auditor job posting skill demands. The unit of analysis is a job posting. The sample includes 55,967 auditor job postings over the period 2010-2019. In Panel A, we regress each skill measure on accounting firm fixed

effects, MSA fixed effects, year fixed effects, years of education, years of experience, indicators for whether education and experience requirements are missing, and the position's hierarchy. In Panel B, we include the same set of predictors, but replace the audit firm and MSA fixed effects with audit office fixed effects (Audit Firm-by-MSA).

Panel A: Firm Fixed Effects

| <i>Skill Type</i> | <i>Firm Fixed Effect</i> | <i>MSA Fixed Effect</i> | <i>Year Fixed Effect</i> | <i>Edu/Exp</i> | <i>Hierarchy</i> | <i>Residual</i> |
|-------------------|--------------------------|-------------------------|--------------------------|----------------|------------------|-----------------|
| <i>Cog</i>        | 10.13%                   | 1.30%                   | 1.89%                    | 0.94%          | 0.01%            | 85.74%          |
| <i>Soc</i>        | 19.24%                   | 0.83%                   | 2.83%                    | 0.57%          | 0.49%            | 76.04%          |

Panel B: Office Fixed Effects

| <i>Skill Type</i> | <i>Office Fixed Effect</i> | <i>Year Fixed Effect</i> | <i>Edu/Exp</i> | <i>Hierarchy</i> | <i>Residual</i> |
|-------------------|----------------------------|--------------------------|----------------|------------------|-----------------|
| <i>Cog</i>        | 15.15%                     | 0.13%                    | 0.79%          | 0.00%            | 83.92%          |
| <i>Soc</i>        | 24.70%                     | 0.00%                    | 0.56%          | 0.50%            | 74.24%          |



The table below lists each of the skills in the auditor job posts in our sample that are categorized as either cognitive skills (Panel A) or social skills (Panel B). We report each skill along with its frequency (the number of job posts the skill appears in, out of the 55,967 auditor job posts in our sample).

**Panel A: Cognitive Skills**

| N  | Skill Name                   | Frequency |
|----|------------------------------|-----------|
| 1  | research                     | 16719     |
| 2  | problem solving              | 6468      |
| 3  | thought leadership           | 4595      |
| 4  | performance analysis         | 4197      |
| 5  | multi-tasking                | 3645      |
| 6  | creativity                   | 3448      |
| 7  | analytical skills            | 2094      |
| 8  | decision making              | 1546      |
| 9  | critical thinking            | 1528      |
| 10 | data analysis                | 1448      |
| 11 | creative problem solving     | 692       |
| 12 | model building               | 498       |
| 13 | independent thinking         | 477       |
| 14 | troubleshooting              | 429       |
| 15 | business intelligence        | 428       |
| 16 | calculation                  | 388       |
| 17 | business analysis            | 274       |
| 18 | online research              | 264       |
| 19 | strategic thinking           | 177       |
| 20 | competitive analysis         | 154       |
| 21 | statistical reporting        | 144       |
| 22 | operations analysis          | 122       |
| 23 | variance analysis            | 110       |
| 24 | knowledge management         | 93        |
| 25 | statistics                   | 90        |
| 26 | statistical analysis         | 88        |
| 27 | econometrics                 | 85        |
| 28 | risk and mitigation analysis | 69        |
| 29 | qualitative analysis         | 68        |
| 30 | technical analysis           | 55        |
| 31 | business case analysis       | 48        |
| 32 | organizational analysis      | 48        |
| 33 | market research              | 40        |
| 34 | performance analytics        | 32        |

|    |                                        |    |
|----|----------------------------------------|----|
| 35 | regression analysis                    | 31 |
| 36 | quantitative analysis                  | 29 |
| 37 | industry analysis                      | 27 |
| 38 | pricing analysis                       | 27 |
| 39 | requirements analysis                  | 24 |
| 40 | total cost of ownership (tco) analysis | 24 |
| 41 | strategic recommendations              | 24 |
| 42 | stakeholder analysis                   | 21 |
| 43 | predictive models                      | 19 |
| 44 | design thinking                        | 19 |
| 45 | data trending                          | 18 |
| 46 | root cause analysis                    | 18 |
| 47 | economic analysis                      | 16 |
| 48 | report analysis                        | 16 |
| 49 | market analysis                        | 14 |
| 50 | cluster analysis                       | 13 |
| 51 | applied statistics                     | 12 |
| 52 | basic research                         | 11 |
| 53 | predictive analytics                   | 11 |
| 54 | multivariate regression                | 11 |
| 55 | qualitative research                   | 9  |
| 56 | strategic analysis                     | 9  |
| 57 | forecasting                            | 8  |
| 58 | random forests                         | 8  |
| 59 | problem identification                 | 8  |
| 60 | regression testing                     | 7  |
| 61 | conceptual data models                 | 7  |
| 62 | business impact analysis               | 7  |
| 63 | consumer research                      | 7  |
| 64 | analytical testing                     | 6  |
| 65 | monte carlo simulation                 | 6  |
| 66 | fit/gap analysis                       | 5  |
| 67 | variance explanation                   | 5  |
| 68 | problem analysis                       | 5  |
| 69 | ad hoc analysis                        | 5  |
| 70 | responding to technical questions      | 4  |
| 71 | sensitivity analysis                   | 4  |
| 72 | analysis computing tools               | 4  |
| 73 | quantitative data analysis             | 4  |

|    |                                 |   |
|----|---------------------------------|---|
| 74 | economic models                 | 4 |
| 75 | algebra                         | 3 |
| 76 | bootstrapping                   | 3 |
| 77 | statistical methods             | 3 |
| 78 | geometry                        | 3 |
| 79 | secondary market analysis       | 2 |
| 80 | research reports                | 2 |
| 81 | analytic functions              | 2 |
| 82 | time series analysis            | 2 |
| 83 | efficiency analyses and testing | 2 |
| 84 | financial data interpretation   | 2 |
| 85 | calculus                        | 2 |
| 86 | computational modeling          | 1 |
| 87 | time series models              | 1 |
| 88 | regression algorithms           | 1 |
| 89 | quantitative research           | 1 |
| 90 | life cycle cost analysis        | 1 |
| 91 | basic mathematics               | 1 |
| 92 | social network analysis         | 1 |
| 93 | deep learning                   | 1 |
| 94 | naive bayes                     | 1 |
| 95 | mathematical modeling           | 1 |
| 96 | support vector machines (svm)   | 1 |
| 97 | neural networks                 | 1 |
| 98 | numerical analysis              | 1 |

**Panel B: Social Skills**

| N  | Skill Name                       | Frequency |
|----|----------------------------------|-----------|
| 1  | communication skills             | 23489     |
| 2  | staff management                 | 14245     |
| 3  | teamwork / collaboration         | 11505     |
| 4  | building effective relationships | 11134     |
| 5  | verbal / oral communication      | 7226      |
| 6  | leadership                       | 6994      |
| 7  | written communication            | 5914      |
| 8  | writing                          | 5395      |
| 9  | mentoring                        | 4645      |
| 10 | people development               | 4092      |
| 11 | presentation skills              | 3901      |

|    |                                             |      |
|----|---------------------------------------------|------|
| 12 | supervisory skills                          | 2987 |
| 13 | proposal writing                            | 1505 |
| 14 | staff development                           | 785  |
| 15 | oral communication                          | 718  |
| 16 | people management                           | 696  |
| 17 | persuasion                                  | 611  |
| 18 | team building                               | 551  |
| 19 | team management                             | 545  |
| 20 | negotiation skills                          | 533  |
| 21 | report writing                              | 502  |
| 22 | talent management                           | 493  |
| 23 | business communications                     | 460  |
| 24 | preparing proposals                         | 407  |
| 25 | conflict management                         | 400  |
| 26 | public speaking                             | 349  |
| 27 | listening                                   | 349  |
| 28 | technical writing / editing                 | 306  |
| 29 | employee relations                          | 225  |
| 30 | business writing                            | 197  |
| 31 | strategic communications                    | 152  |
| 32 | prepare presentations                       | 103  |
| 33 | effective communications                    | 92   |
| 34 | personnel management                        | 88   |
| 35 | articulating value propositions             | 85   |
| 36 | employee engagement                         | 80   |
| 37 | strategic leadership                        | 80   |
| 38 | corporate communications                    | 61   |
| 39 | persuasive writing                          | 51   |
| 40 | internal communications                     | 36   |
| 41 | stakeholder communications                  | 15   |
| 42 | crisis communications                       | 8    |
| 43 | presenting solutions                        | 6    |
| 44 | presentation delivery                       | 4    |
| 45 | business presentations                      | 2    |
| 46 | client relationship building and management | 2    |
